# Supplementary material for: Attach Me If You Can: Murine Norovirus Binds to Commensal Bacteria and Fungi
Source: MDPI journal article supplement (doi:10.3390/v12070759), 2020-07-14
Supplement: s1 [file s1]

## Article

# Attach Me If You Can: Murine Norovirus Binds to Commensal Bacteria and Fungi

Jasmine L. Madrigal, Sutonuka Bhar, Samantha Hackett, Haley Engelken, Ross Joseph, Nemat O. Keyhani and Melissa K. Jones \*

Microbiology and Cell Science Department, IFAS, University of Florida, Gainesville, FL 32611, USA

\* Correspondence: mmk@ufl.edu

Received: 02 May 2020; Accepted: 08 July 2020; Published: 14 July 2020

## Supplemental Materials and Methods

**Enumeration of bacteria in the presence of MNV.** Attachment assays between virus and bacteria were performed as previously described for time course assays. All sample preparations were performed within a BSL-2 hood. At each time point an aliquot of virus:bacteria was spun down at  $10,000 \times g$  for 5 min, washed twice with equal volume of  $1 \times$  PBS, then finally resuspended in 1 mL  $1 \times$  PBS. Samples were serially diluted from  $10^1$  to  $10^6$  then each dilution was spot plated onto appropriate agar plates in triplicate, with each spot containing 10  $\mu$ L of sample. Agar plates were left to dry without lids for ~10 min then incubated with lids and in a non-inverted position, with the agar side facing up, under appropriate conditions. For *Lactobacillus acidophilus* and *Bacteroides dorei* plates were incubated in anaerobic chambers at 37 °C for two days while *Escherichia coli* and *Enterobacter cloacae* plates were incubated aerobically at 37 °C for 1 day. After incubation, bacterial colonies were counted for each time point.

**MNV stability over time.** MNV-1 was inoculated into PBS at a concentration of  $1 \times 10^7$  TCID<sub>50</sub>/mL and incubated at 37 °C with rotation for 24 hrs in the manner performed for virus-bacteria attachment assays. Samples were taken at the indicated time points, RNA extracted and RT-qPCR performed as outlined in the manuscript to determine MNV genome copies.

**Optimization of *Candida. albicans* growth.** Light microscopy of cells from solid culture was used to further confirm cell morphology. Based on the parameters examined above, *C. albicans* was cultured on Sabouraud Dextrose Agar (SDA) plates with pH 5.6  $\pm$  0.2 at 25 °C for regular strain maintenance in the laboratory. Under these conditions, cultures were observed to consist almost entirely of yeast-like cells in fresh cultures. To prepare liquid cultures for use in viral attachment assays, isolated colonies from three-day old SDA cultures of *C. albicans* were picked with toothpicks and inoculated into 5 mL of Sabouraud Dextrose Broth (SDB) (pH 5.6  $\pm$  0.2) and incubated overnight at 25 °C with shaking at 200 rpm.

## Supplemental Results

**Determination of bacterial survival.** Survival of bacterial strains included in MNV and HNoV attachment assays were assessed over time. *E. coli* and *E. cloacae* concentrations remained stable, but *B. dorei* and *L. acidophilus* concentrations declined and often dropped below the limit of detection by 24 hrs.

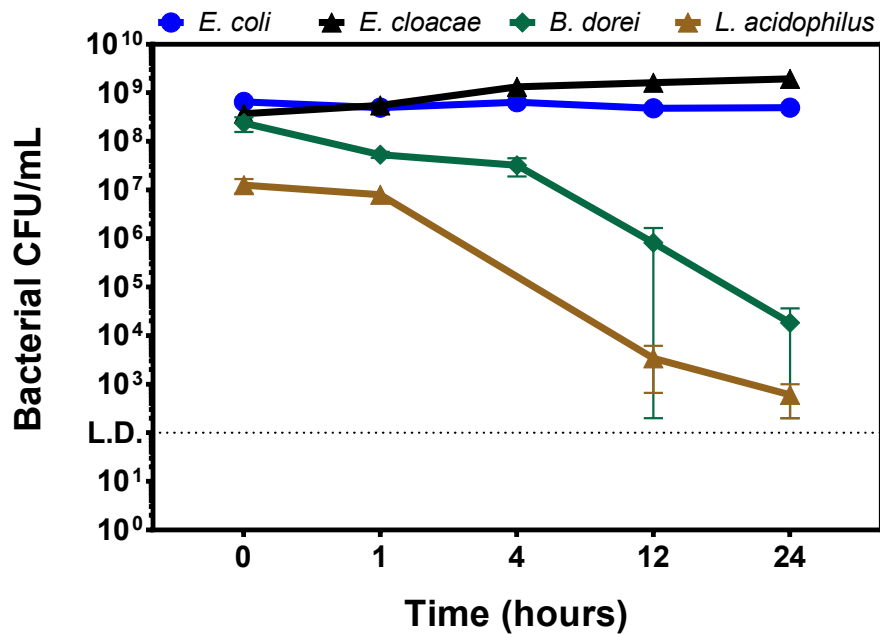

**Figure S1.** Survival of bacteria in the presence of MNV. Survival of representative bacteria over 24 hrs was tested in the presence of murine norovirus. Both *E. cloacae* and *E. coli* concentrations remain stable over time. However, *B. dorei* and *L. acidophilus* concentrations decline rapidly after 1-4 hrs of incubation. Significance over time was determined using a one way ANOVA and differences at given time points between specific samples was analyzed using unpaired Student's t test, both in GraphPad Prism.

*Determination of MNV-1 survival.* Survival of MNV-1 in the absence of bacteria was measured over time under conditions used in virus-bacterial attachment assays. Results showed MNV genome copies remained relatively stable over 24 hrs and no significant decreases in virus concentration were observed compared to amounts of input virus.

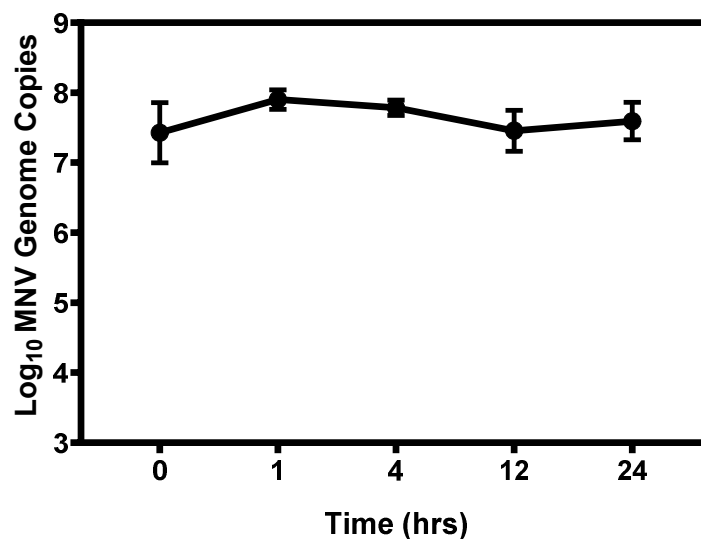

**Figure S2.** Survival of MNV over time. Survival of MNV at 37 °C was assessed over 24 hrs using conditions that mimicked virus-bacteria attachment assays. RT-qPCR was used to quantify viral genomes at the given time points. No significant decreases in virus concentration were observed (n=3). Significance over time was determined using a one sample t and Wilcoxon test in GraphPad Prism.

*Optimization of C. albicans growth.* As the goal of this study was to assess viral attachment to *C. albicans* cells under conditions of commensal growth, it was important to ensure that *C. albicans* was reliably cultured in the yeast-like state. To this end, culture conditions were optimized by addressing growth medium, pH, growth temperature, and culture age. For these optimizations, colony morphology was used as a readout for cell morphology, as yeast-like cells appear smooth in culture, whereas hyphae appear wrinkled (Figure S1). The optimum growth conditions for generating yeast-like cells was determined to be growth in SDB broth and overnight (~18 hrs) incubation at 25 °C.

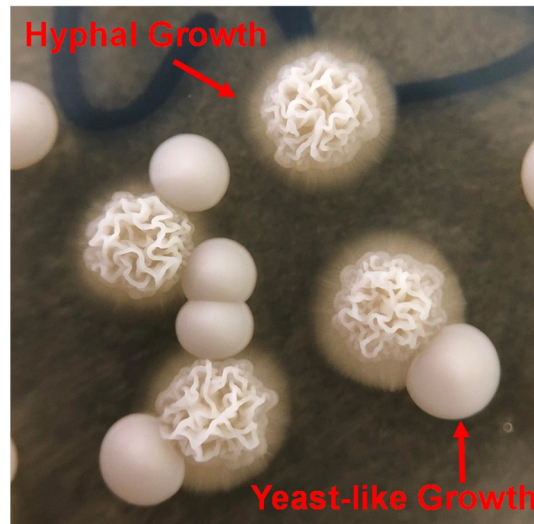

**Figure S3.** Growth phases of *C. albicans*. Light microscopy reveals the hyphal and yeast-like growth phases of *C. albicans*. Fungal growth conditions were optimized for generation of the yeast-like form for inclusion in MNV attachment assays.
